# Supplementary material
Source: MDPI journal article supplement (https://www.mdpi.com/2076-3417/12/15/7494)
Supplement: s1 [file s1 › applsci-1817091-supplementary.pdf]

## Lagrangian equations derivation process

The Lagrangian equation was used to calculate the equivalent joint torque dynamic equation of the SAM [1, 2]. Regardless of external interference and rigid-flexible coupling deformation, the kinetic energy of a SAM with a fixed base is mainly composed of the following parts: linkage kinetic energy, universal joint kinetic energy, and load kinetic energy. Therefore, the total kinetic energy of the SAM can be described as follows:

$$K = K_r + K_l + K_p \quad (S1)$$

where  $K_r$  is the kinetic energy of the connecting rod,  $K_l$  is the kinetic energy of the universal joint, and  $K_p$  is the kinetic energy of the end tool and load.

Assuming that the mass of any particle  $P$  on the connecting rod  $i$  is  $dm$ , its kinetic energy is as follows:

$$\begin{aligned} dK_i &= \frac{1}{2} v_p^2 dm \\ &= \frac{1}{2} \text{Trace} \left[ \sum_{j=1}^i \sum_{k=1}^i \frac{\partial \mathbf{D}_i}{\partial q_j} \mathbf{r}_p^i (\mathbf{r}_p^i)^T \left( \frac{\partial \mathbf{D}_i}{\partial q_k} \right)^T \dot{q}_j \dot{q}_k \right] dm \end{aligned} \quad (S2)$$

where  $\mathbf{D}_i = \mathbf{D}_i^0$  is the transformation matrix of the  $i$ -th joint, and  $\mathbf{r}_p^i$  is the local coordinate system's position vector. We can then integrate the kinetic energy of the particle on connecting rod  $i$  to obtain the kinetic energy of connecting rod  $i$ :

$$\begin{aligned} K_i &= \int_{link\ i} dK_i \\ &= \frac{1}{2} \text{Trace} \sum_{j=1}^i \sum_{k=1}^i \frac{\partial \mathbf{D}_i}{\partial q_j} \left( \int_{link\ i} \mathbf{r}_p^i (\mathbf{r}_p^i)^T dm \right) \left( \frac{\partial \mathbf{D}_i}{\partial q_k} \right)^T \dot{q}_j \dot{q}_k \end{aligned} \quad (S3)$$

where  $\int_{link\ i} \mathbf{r}_p^i (\mathbf{r}_p^i)^T dm$  is the pseudo-inertia matrix of link  $i$  expressed by  $\mathbf{I}_i$ .

$$\begin{aligned} \mathbf{I}_i &= \int_{link\ i} \mathbf{r}_p^i (\mathbf{r}_p^i)^T dm \\ &= \begin{bmatrix} \int_{link\ i} x_i^2 dm & \int_{link\ i} x_i y_i dm & \int_{link\ i} x_i z_i dm & \int_{link\ i} x_i dm \\ \int_{link\ i} x_i y_i dm & \int_{link\ i} y_i^2 dm & \int_{link\ i} y_i z_i dm & \int_{link\ i} y_i dm \\ \int_{link\ i} x_i z_i dm & \int_{link\ i} y_i z_i dm & \int_{link\ i} z_i^2 dm & \int_{link\ i} z_i dm \\ \int_{link\ i} x_i dm & \int_{link\ i} y_i dm & \int_{link\ i} z_i dm & \int_{link\ i} dm \end{bmatrix} \end{aligned} \quad (S4)$$

The total kinetic energy of each link of the SAM can be described as follows:

$$\begin{aligned} K_l &= \sum_{i=1}^{20} K_i \\ &= \frac{1}{2} \sum_{i=1}^{20} \text{Trace} \left[ \sum_{j=1}^i \sum_{k=1}^i \frac{\partial \mathbf{D}_i}{\partial q_j} \mathbf{I}_i \left( \frac{\partial \mathbf{D}_i}{\partial q_k} \right)^T \dot{q}_j \dot{q}_k \right] \end{aligned} \quad (S5)$$

Assuming that all external loads and the weight of the end tool are concentrated on a specific point on the end joint of the SAM, there would only be translational movement without rotational kinetic energy:

$$K_p = \frac{1}{2} m_{gp} \text{Trace} \left[ \sum_{j=1}^{20} \sum_{k=1}^{20} \frac{\partial \mathbf{D}_{20}}{\partial q_j} \mathbf{r}^{20} (\mathbf{r}^{20})^T \left( \frac{\partial \mathbf{D}_{20}}{\partial q_k} \right)^T \dot{q}_j \dot{q}_k \right] \quad (S6)$$

where  $m_{gp}$  is the mass of the end tool and load.

Ignoring the rigid-flexible coupling elastic deformation of the cables, connecting rods, and joints, as well as any external interference, the SAM is only affected by the

gravitational potential energy  $P$ :

$$P = P_{gl} + P_{gp} \quad (S7)$$

where  $P_{gl}$  is the gravitational potential energy of the connecting rod and the universal joint, and  $P_{gp}$  is the gravitational energy of the end tool and load.

The gravitational energy at position  $\mathbf{r}^i$  on any connecting rod  $i$  of the SAM is as follows:

$$d_{pi} = -dm \mathbf{g}^T \mathbf{r}^0 = -\mathbf{g}^T \mathbf{D}_i \mathbf{r}^i dm \quad (S8)$$

where  $\mathbf{g}^T = [0, 0, 9.81, 1]$ .

Integrating the Eq (S8), the total gravitational energy of the connecting rod can be obtained as follows:

$$P_{gl} = \sum_{i=1}^{20} -\mathbf{g}^T \mathbf{D}_i \int_{link i} \mathbf{r}^i dm = -\sum_{i=1}^{20} m_i \mathbf{g}^T \mathbf{D}_i \mathbf{r}_l^i \quad (S9)$$

where  $m_i$  is the mass of the connecting rod  $i$  (if  $i$  is an even number, it is the mass of the universal joint), and  $\mathbf{r}_l^i$  is the center of gravity of the connecting rod  $i$  relative to the previous joint coordinate system.

The gravitational energy of the loading mass of the end tool can be described as follows:

$$P_{gp} = -m_{gp} \mathbf{g}^T \mathbf{D}_{20} \mathbf{r}_g^{20} \quad (S10)$$

where  $m_{gp}$  is the mass of the end tool and load, and  $\mathbf{r}_g^{20}$  is the coordinate of the center of gravity relative to the previous joint.

### Derivation of dynamics equation

The cable traction is equivalent to the joint torque, and the SAM becomes a typical serial multi-joint manipulator, with the final dynamic model expressed as follows:

$$\mathbf{T} = \mathbf{M}(q) \ddot{\mathbf{q}} + \mathbf{H}(q, \dot{\mathbf{q}}) \dot{\mathbf{q}} + \mathbf{G}(q) + \mathbf{D} \quad (S11)$$

where  $\ddot{\mathbf{q}} \in R^{20}$  is the joint angular acceleration vector,  $\dot{\mathbf{q}} \in R^{20}$  is the joint velocity vector, and  $\mathbf{T} \in R^{20}$  is the input torque vector,  $\mathbf{M}(q) \in R^{20 \times 20}$  is a nonsingular positive definite inertial force matrix,  $\mathbf{H}(q, \dot{\mathbf{q}}) \in R^{20 \times 20}$  is the term of centrifugal force and Coriolis force.  $\mathbf{G}(q)$  is the gravitational term (including the gravity of the connecting rod, the universal joint, the end tools and the load), and  $\mathbf{D}$  represents the unknown bounded disturbance of the unstructured unbuilt dynamic model.

Using the Lagrangian method to expand Eq (S11), the torque of any joint  $p$  can be obtained as follows:

$$\begin{aligned} \mathbf{T}_p &= \frac{d}{dt} \frac{\partial L}{\partial \dot{q}_p} - \frac{\partial L}{\partial q_p} = \sum_{i=p}^{20} \sum_{k=1}^i \text{Trace} \left( \frac{\partial \mathbf{D}_i}{\partial q_k} \mathbf{I}_i \left( \frac{\partial \mathbf{D}_i}{\partial q_p} \right)^T \right) \ddot{q}_k \\ &+ \sum_{i=p}^{20} \sum_{j=1}^i \sum_{k=1}^i \text{Trace} \left( \frac{\partial^2 \mathbf{D}_i}{\partial q_j \partial q_k} \mathbf{I}_i \left( \frac{\partial \mathbf{D}_i}{\partial q_p} \right)^T \right) \dot{q}_j \dot{q}_k \\ &+ m_{gp} \sum_{j=p}^{20} \text{Trace} \left[ \frac{\partial \mathbf{D}_{20}}{\partial q_j} \mathbf{r}^{20} (\mathbf{r}^{20})^T \frac{\partial \mathbf{D}_{20}}{\partial q_p} \right] \ddot{q}_j \\ &+ m_{gp} \sum_{j=p}^{20} \sum_{k=p}^{20} \text{Trace} \left[ \frac{\partial \mathbf{D}_{20}}{\partial q_j \partial q_k} \mathbf{r}^{20} (\mathbf{r}^{20})^T \frac{\partial \mathbf{D}_{20}}{\partial q_p} \right] \dot{q}_j \dot{q}_k \\ &- \sum_{i=p}^{20} m_i \mathbf{g}^T \frac{\partial \mathbf{D}_i}{\partial q_p} \mathbf{r}_l^i - m_{gp} \mathbf{g}^T \frac{\partial \mathbf{D}_{20}}{\partial q_p} \mathbf{r}_g^{20} + \mathbf{D}_p \end{aligned} \quad (S12)$$

where the Lagrangian function  $L$  is as follows:

$$\begin{aligned}
L = K - P \\
& + \frac{1}{2} \sum_{i=1}^{20} \sum_{j=1}^i \sum_{k=1}^i \text{Trace} \left[ \frac{\partial \mathbf{D}_i}{\partial q_j} \mathbf{I}_i \left( \frac{\partial \mathbf{D}_i}{\partial q_k} \right)^T \dot{q}_j \dot{q}_k \right] \\
& + \frac{1}{2} m_{gp} \text{Trace} \left[ \sum_{j=1}^{20} \sum_{k=1}^{20} \frac{\partial \mathbf{D}_{20}}{\partial q_j} \mathbf{r}^{20} (\mathbf{r}^{20})^T \left( \frac{\partial \mathbf{D}_{20}}{\partial q_k} \right)^T \dot{q}_j \dot{q}_k \right] \\
& + \sum_{i=1}^{20} m_i \mathbf{g}^T \mathbf{D}_i \mathbf{r}_i^i + m_{gp} \mathbf{g}^T \mathbf{D}_{20} \mathbf{r}_g^{20}
\end{aligned} \tag{S13}$$

### References

1. Spong, M. W., Hutchinson, S., Vidyasagar, M.; Robot modeling and control, *John Wiley & Sons*. **2020**, pp. 163–214. [CrossRef]
2. Kurfess, T. R.; Lagrangian dynamics. *Robotics and Automation Handbook*. CRC Press, **2018**, pp. 73–88. [CrossRef]
